# Supplementary material for: Isometric spiracular scaling in scarab beetles—implications for diffusive and advective oxygen transport
Source: eLife journal article supplement (doi:10.7554/elife.82129), 2022-09-13

Figure 2 - figure supplement 1

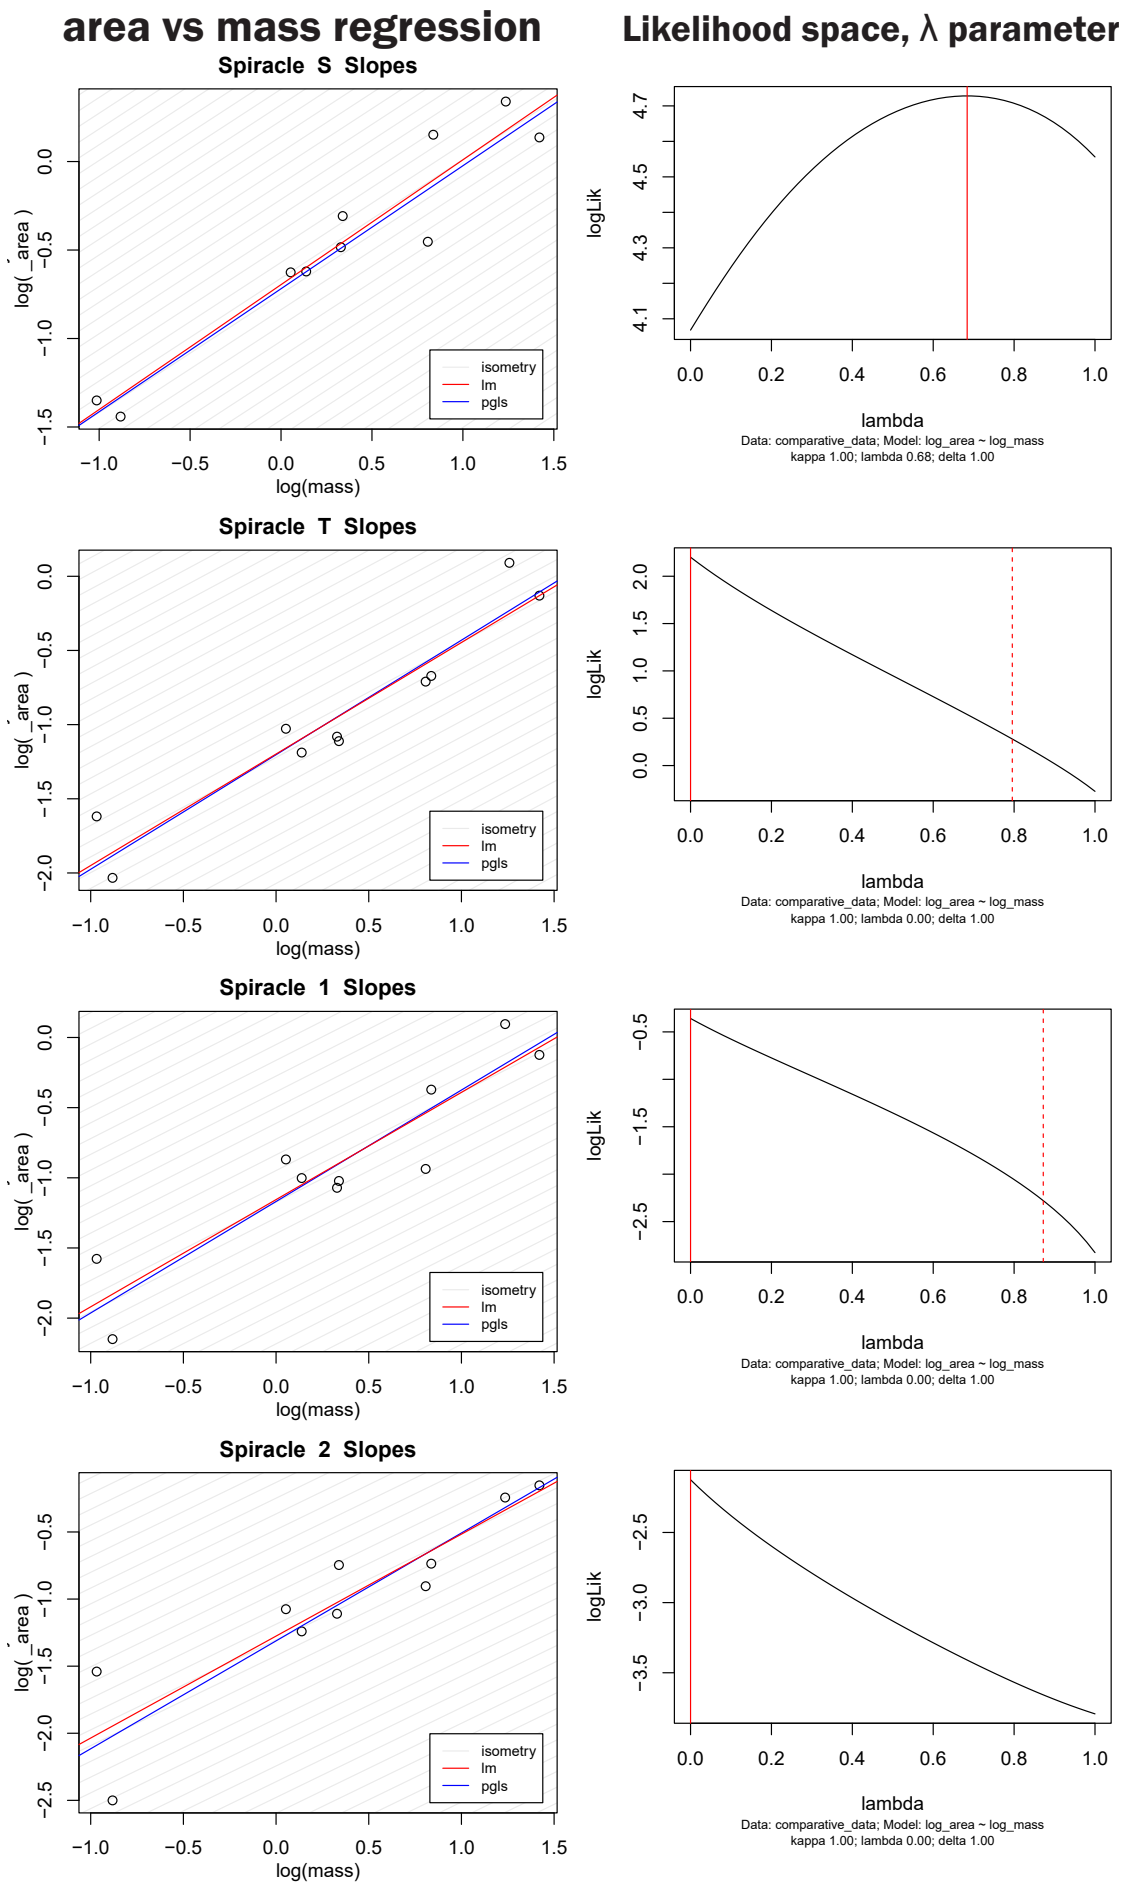

## area vs mass regression

Spiracle 3 Slopes

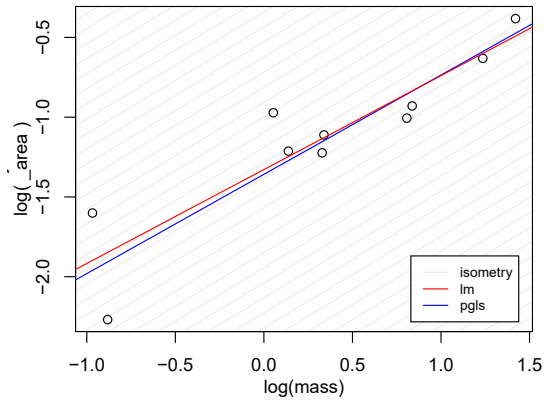

## Likelihood space, $\lambda$ parameter

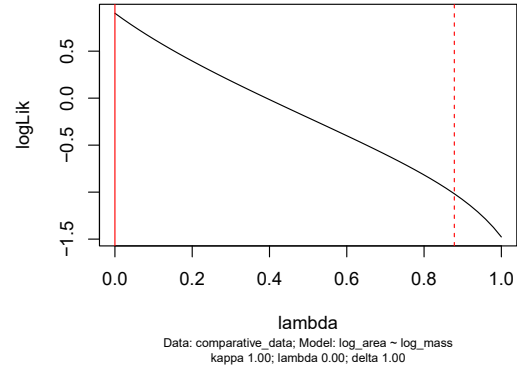

Spiracle 4 Slopes

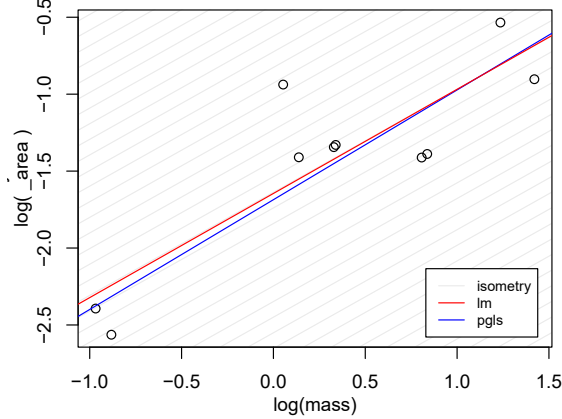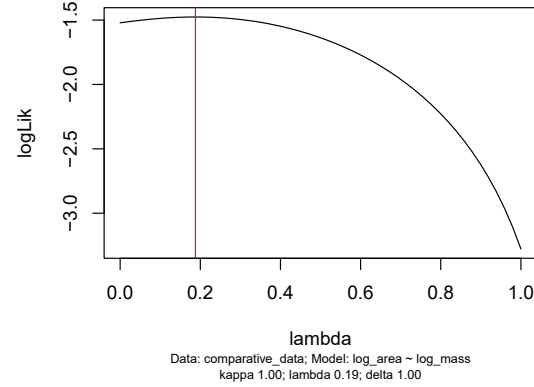

Spiracle 5 Slopes

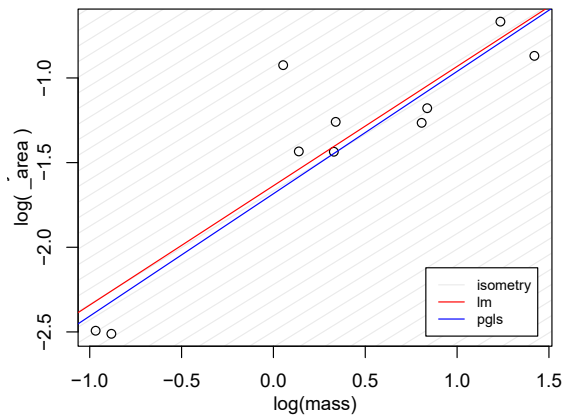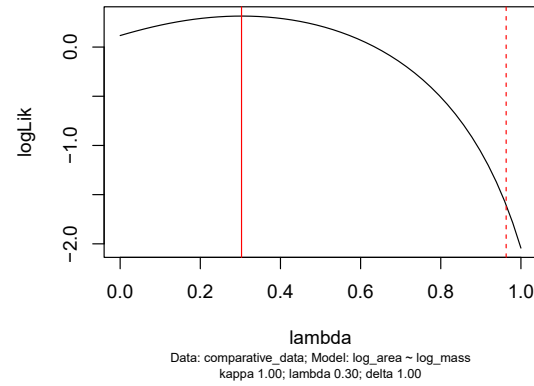

Spiracle 6 Slopes

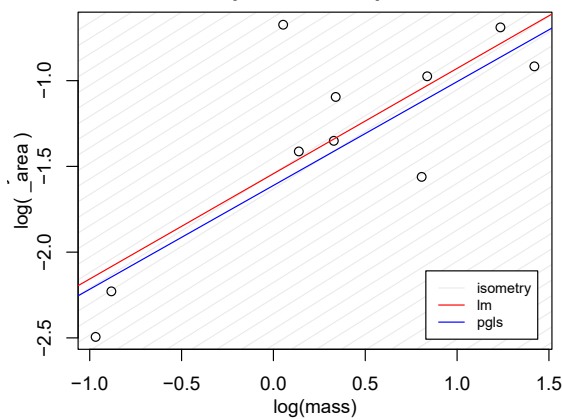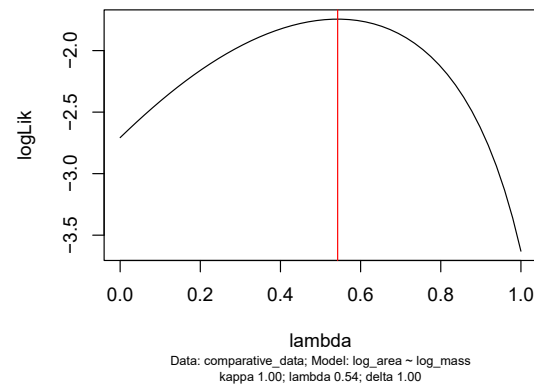

## depth vs mass regression

Spiracle S Slopes

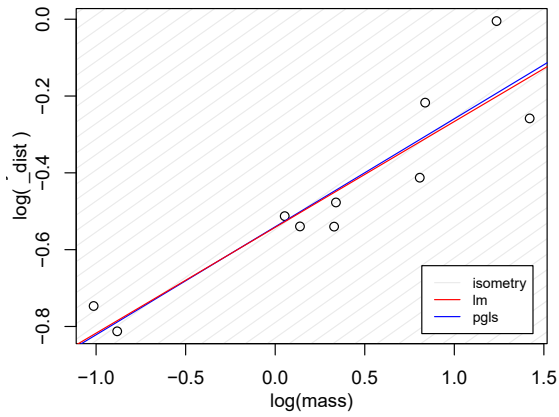

## Likelihood space, $\lambda$ parameter

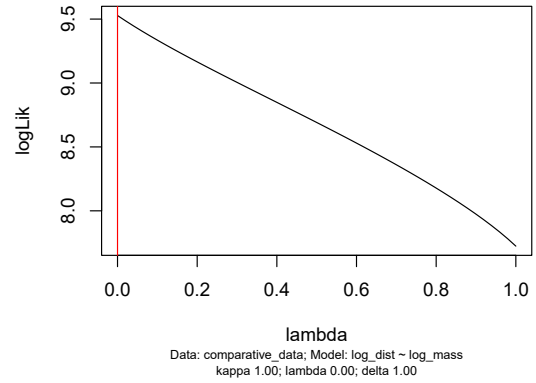

Spiracle T Slopes

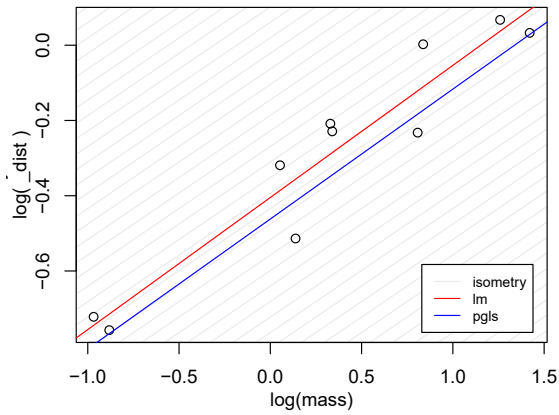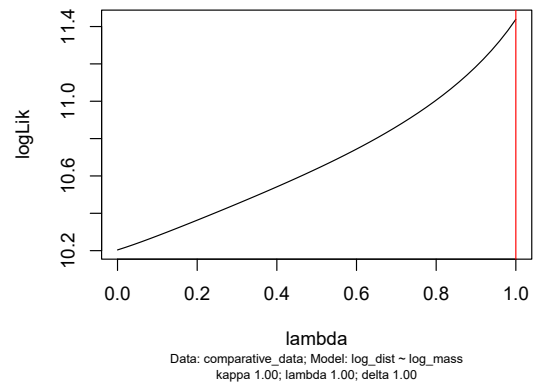

Spiracle 1 Slopes

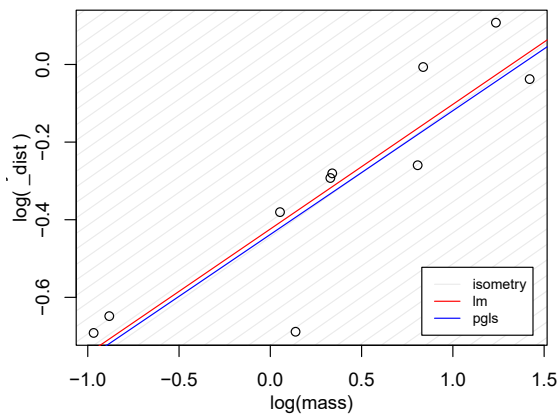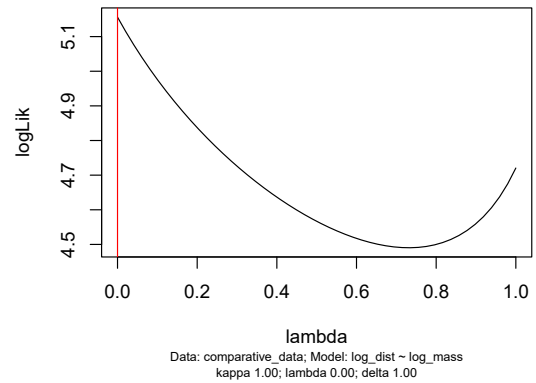

Spiracle 2 Slopes

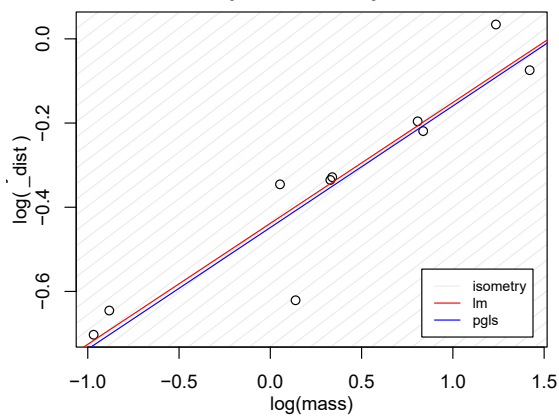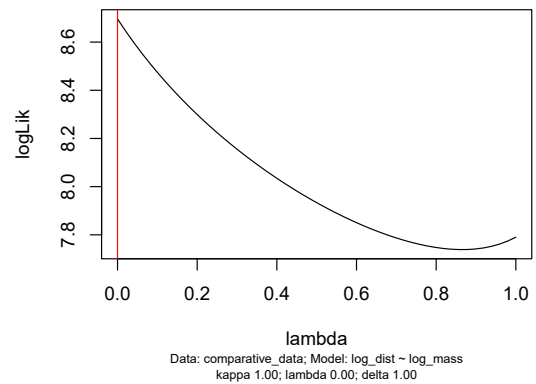

## depth vs mass regression

Spiracle 3 Slopes

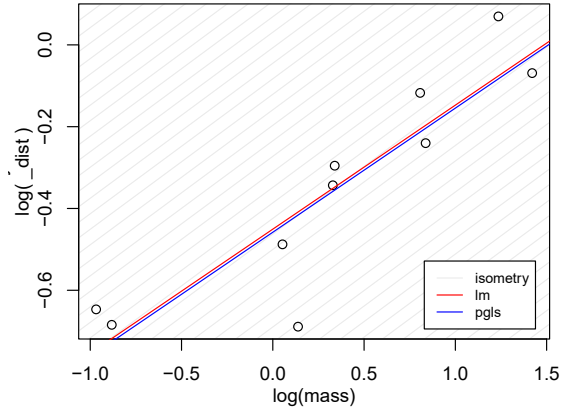

## Likelihood space, $\lambda$ parameter

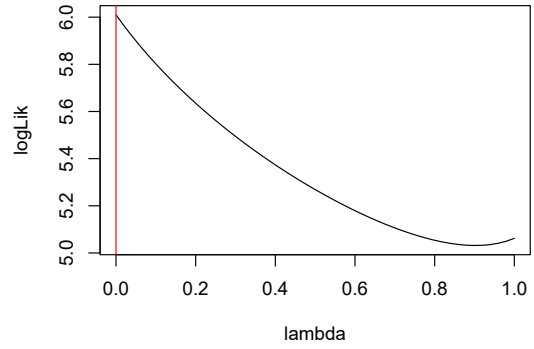

Spiracle 4 Slopes

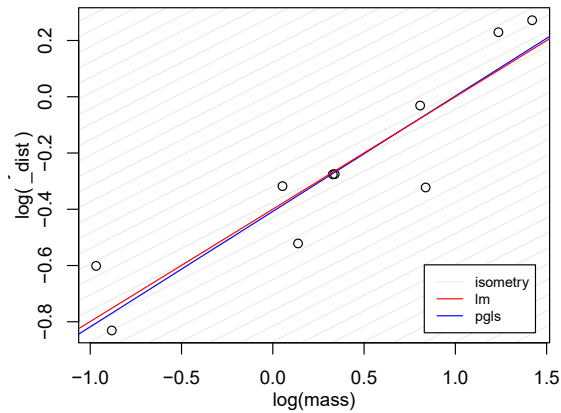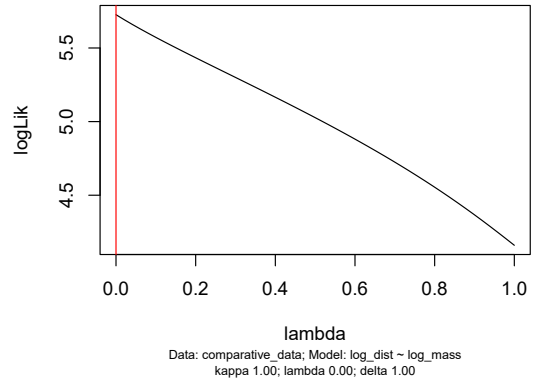

Spiracle 5 Slopes

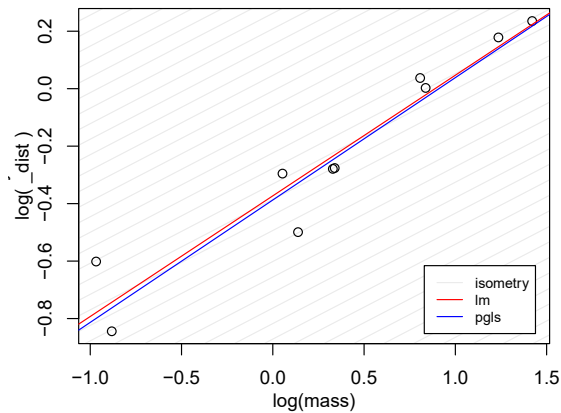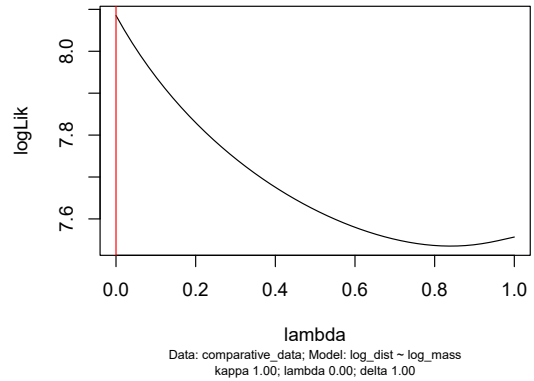

Spiracle 6 Slopes

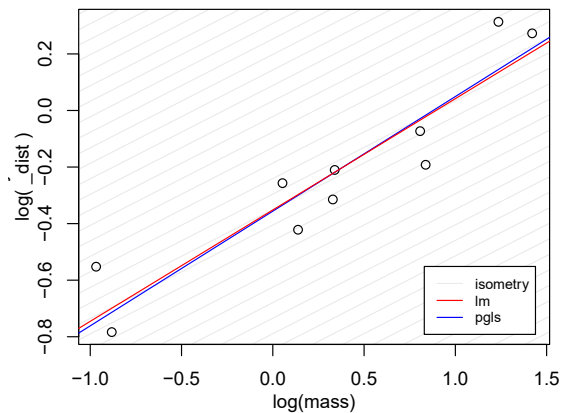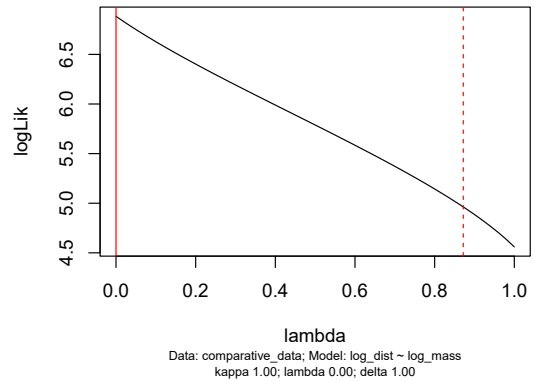

## area/depth vs mass regression

## Likelihood space, $\lambda$ parameter

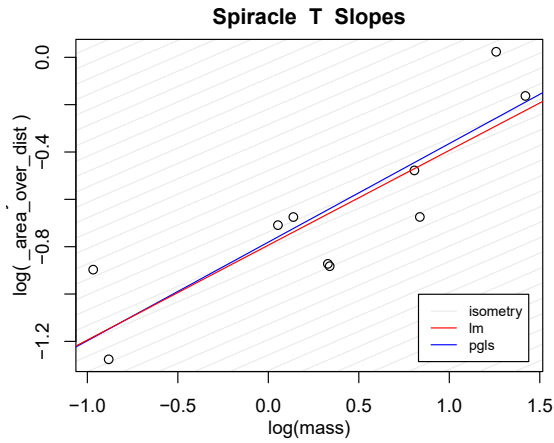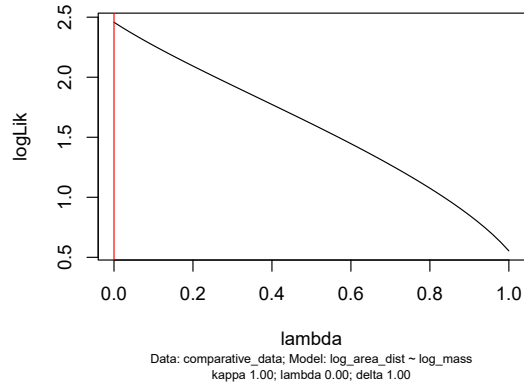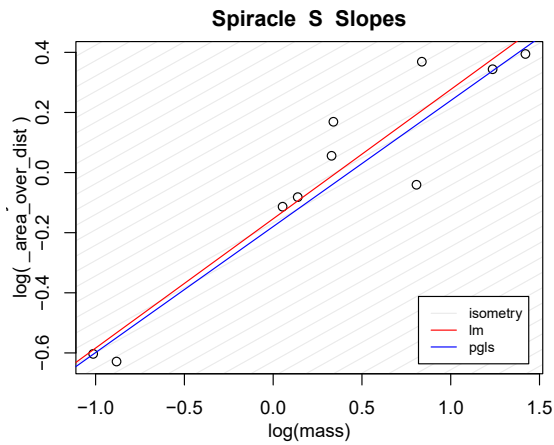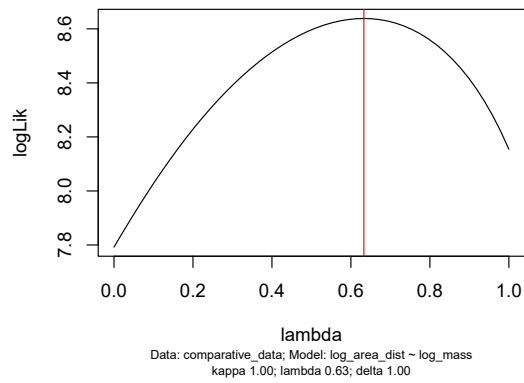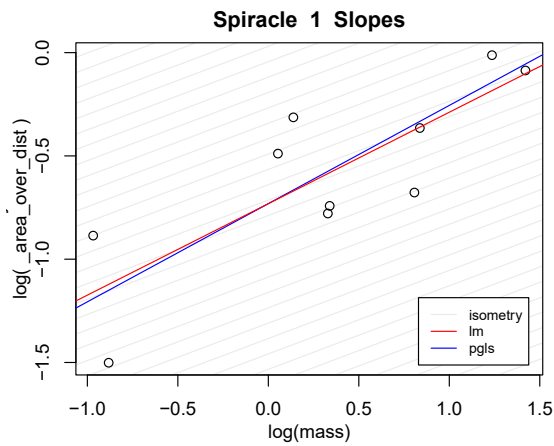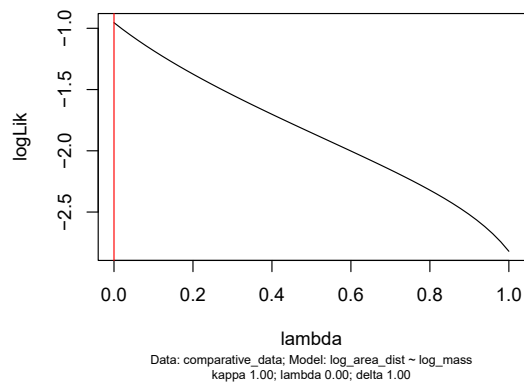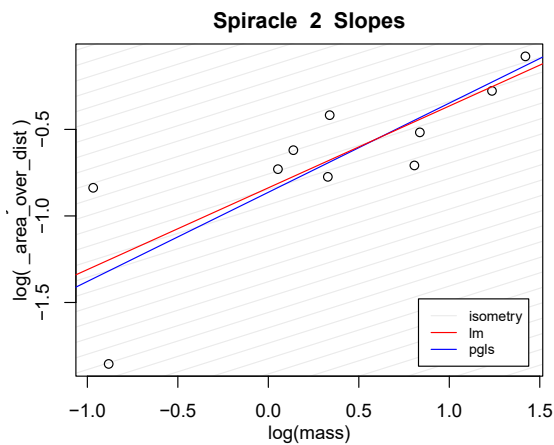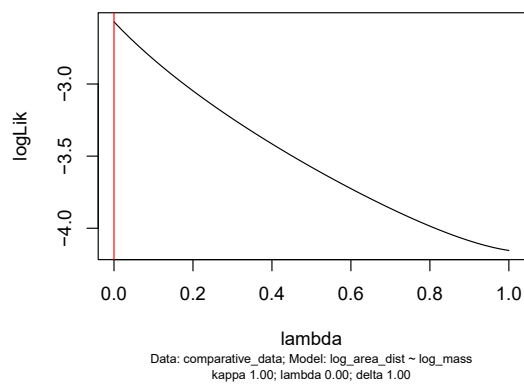

## area/depth vs mass regression

Spiracle 3 Slopes

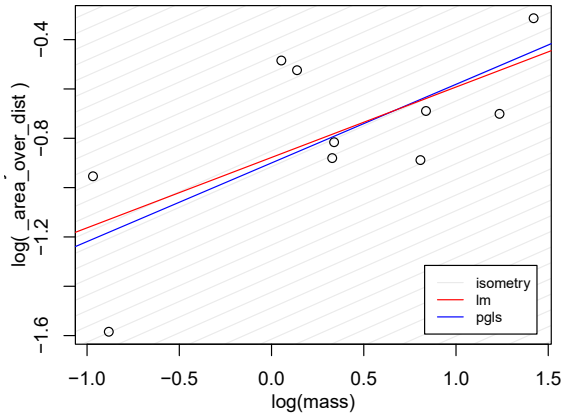

## Likelihood space, $\lambda$ parameter

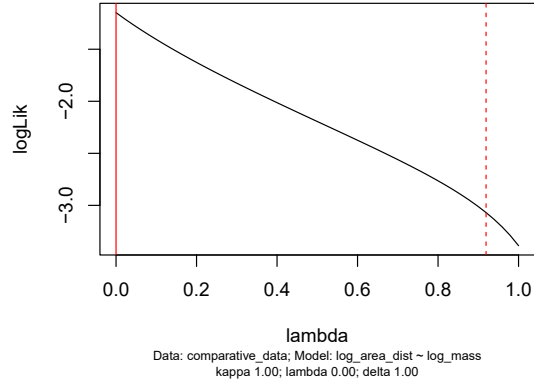

Spiracle 4 Slopes

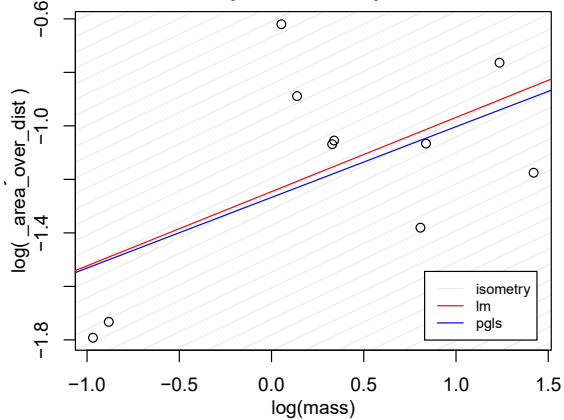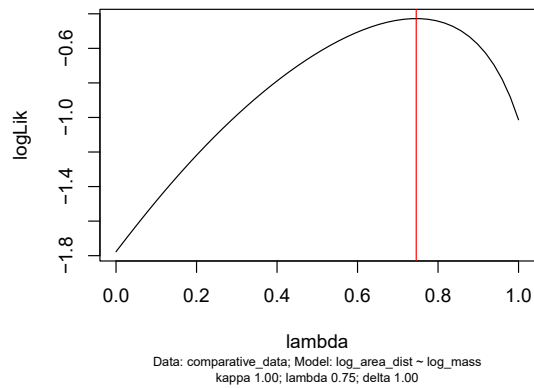

Spiracle 5 Slopes

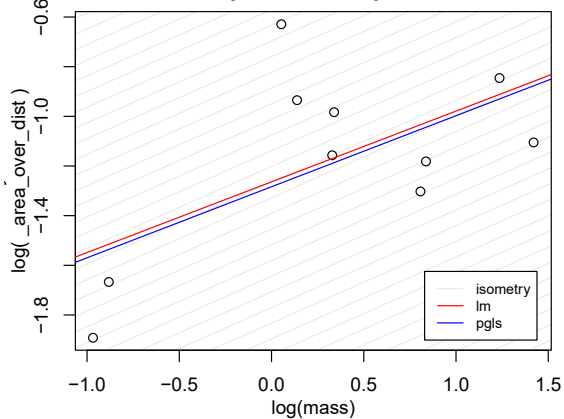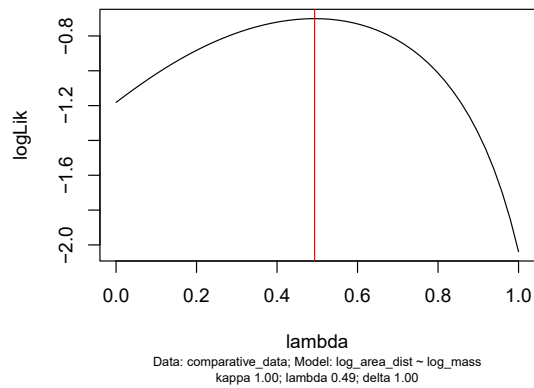

Spiracle 6 Slopes

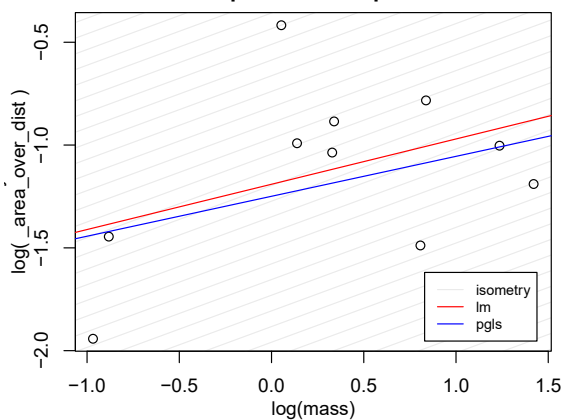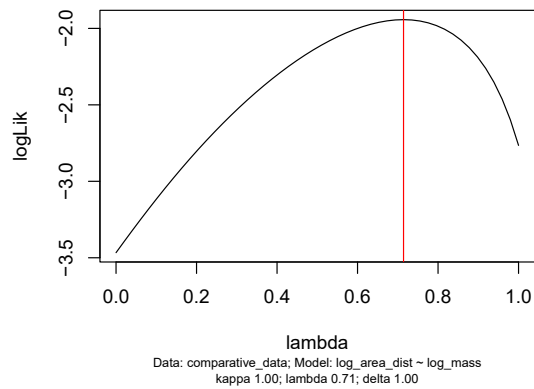

area<sup>2</sup>/depth vs mass regression

Likelihood space, λ parameter

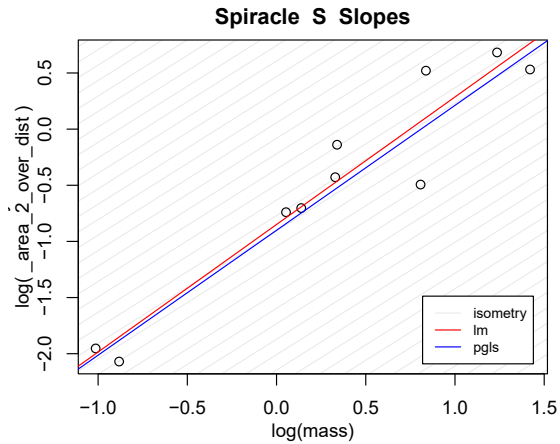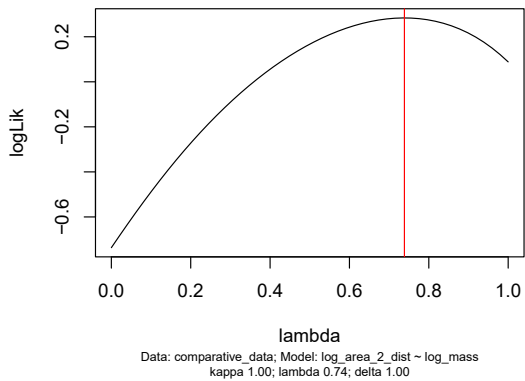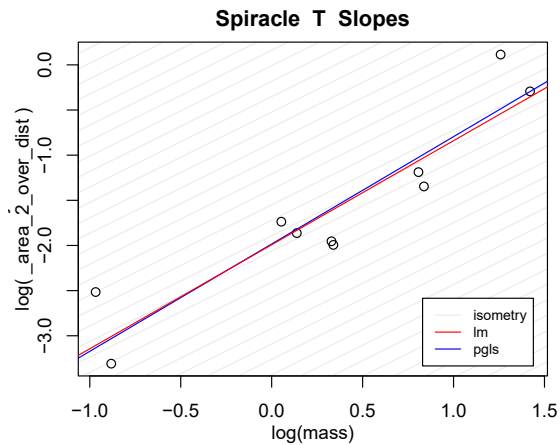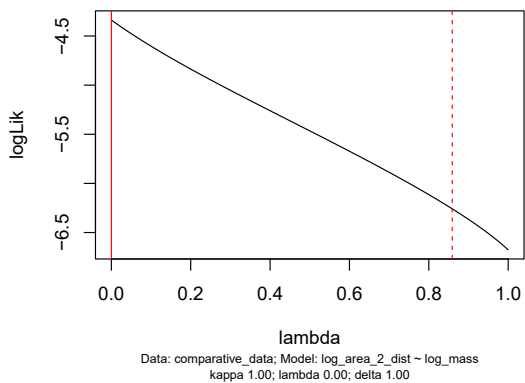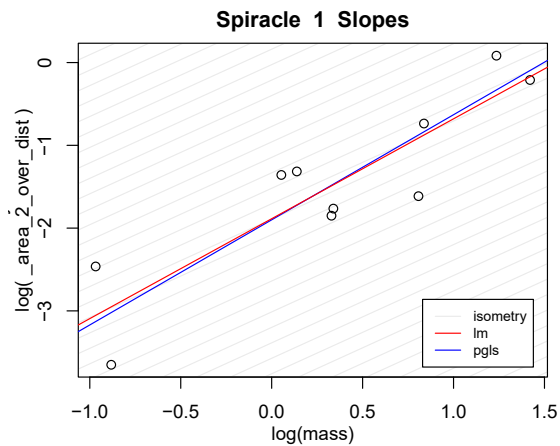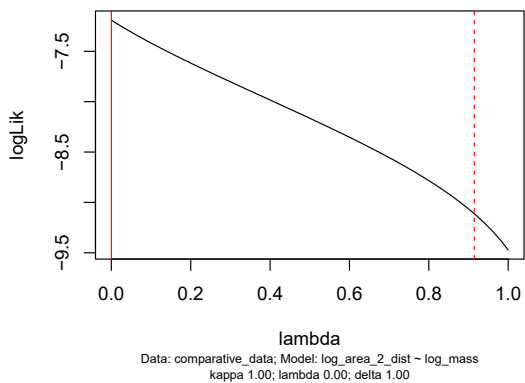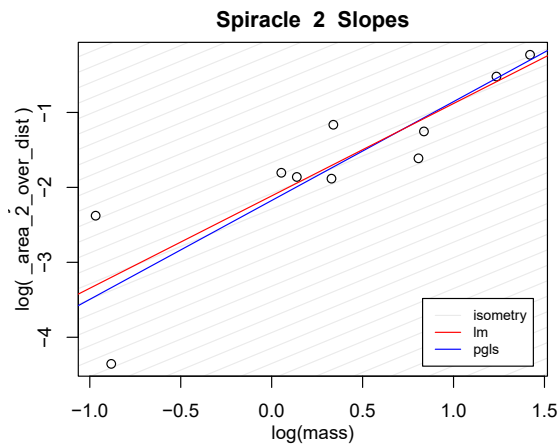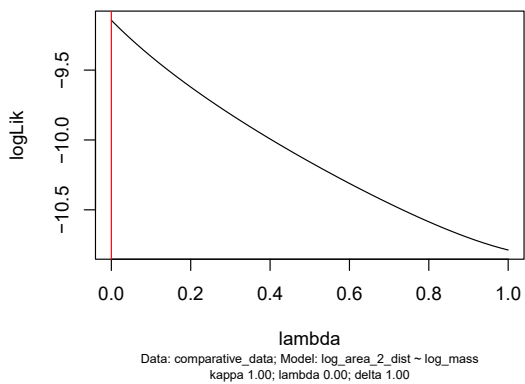

area<sup>2</sup>/depth vs mass regression

Likelihood space, λ parameter

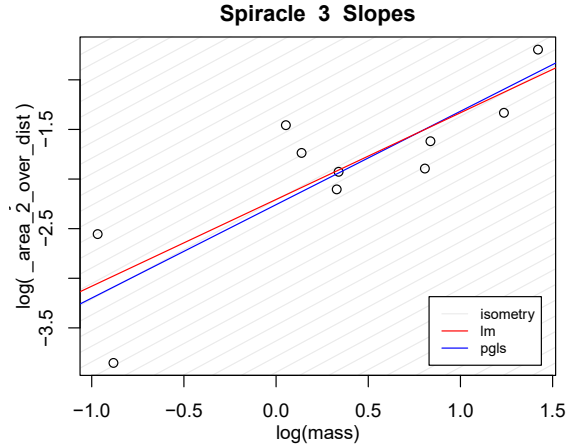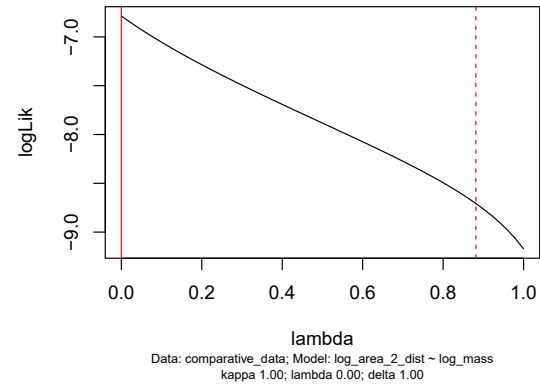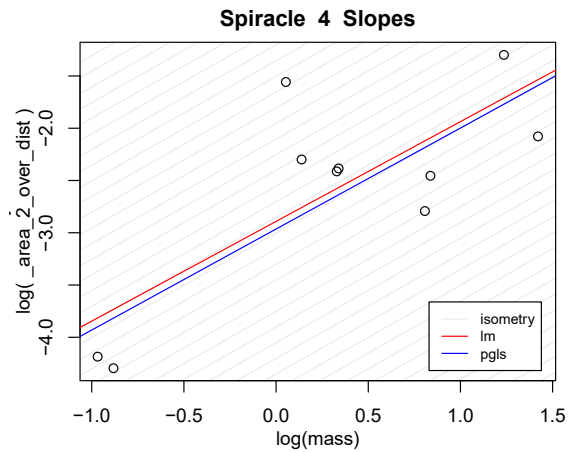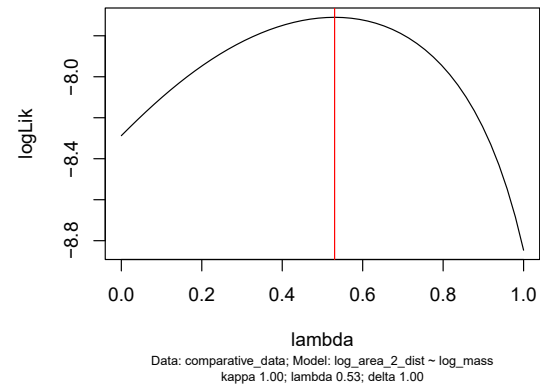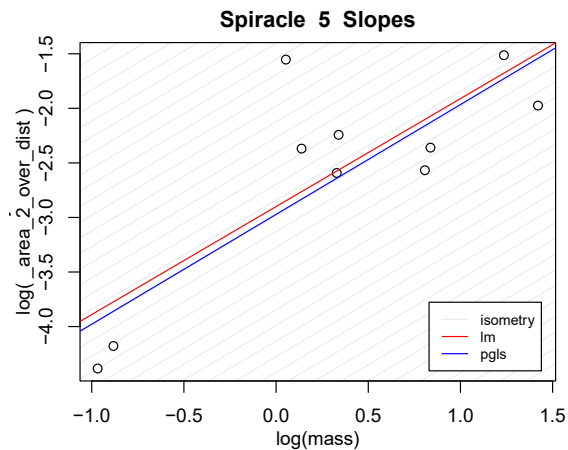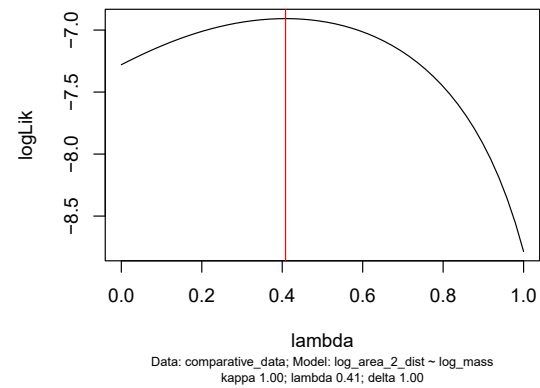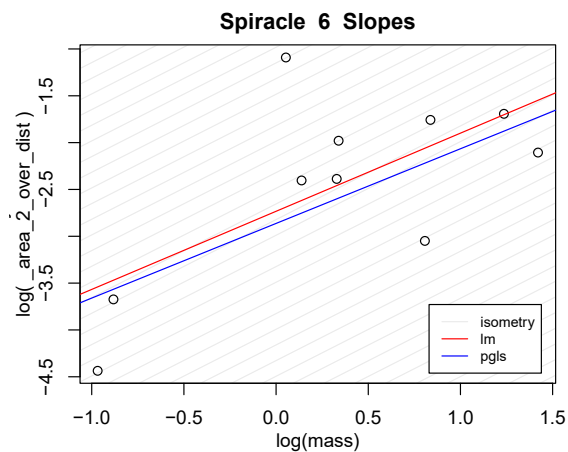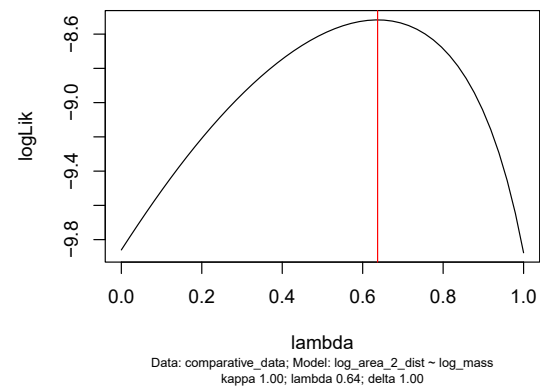

Supplement: supp [file elife_poa_e82129_Figure_2_figure_supplement_1.pdf › elife_poa_e82129_Figure_2_figure_supplement_1.pdf]
