# Supplementary material for: Isometric spiracular scaling in scarab beetles—implications for diffusive and advective oxygen transport
Source: eLife journal article supplement (doi:10.7554/elife.82129), 2022-09-13

Figure 2 - figure supplement 2

## Nonidentifiability of phylogenetic signal parameter, area vs mass

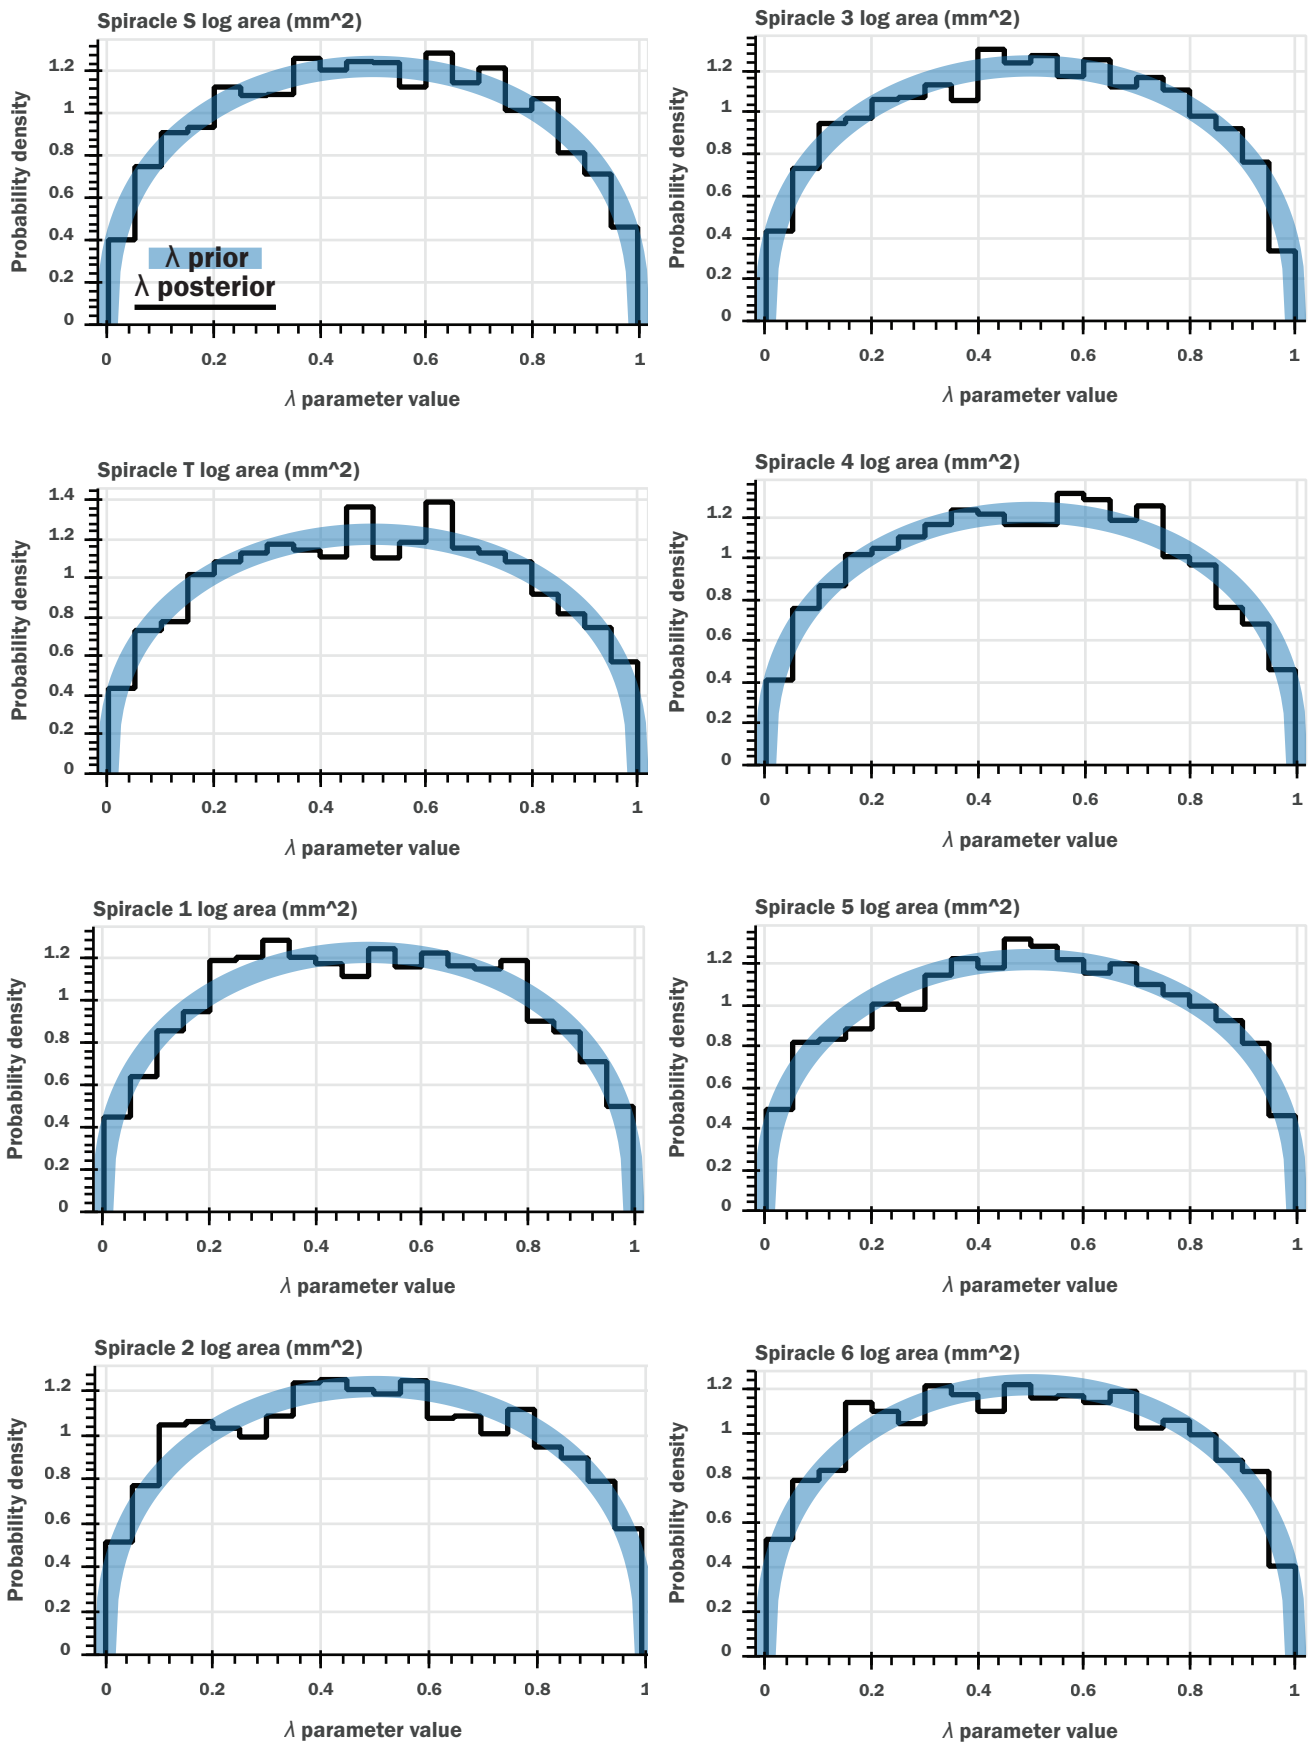

# Nonidentifiability of phylogenetic signal parameter, depth vs mass

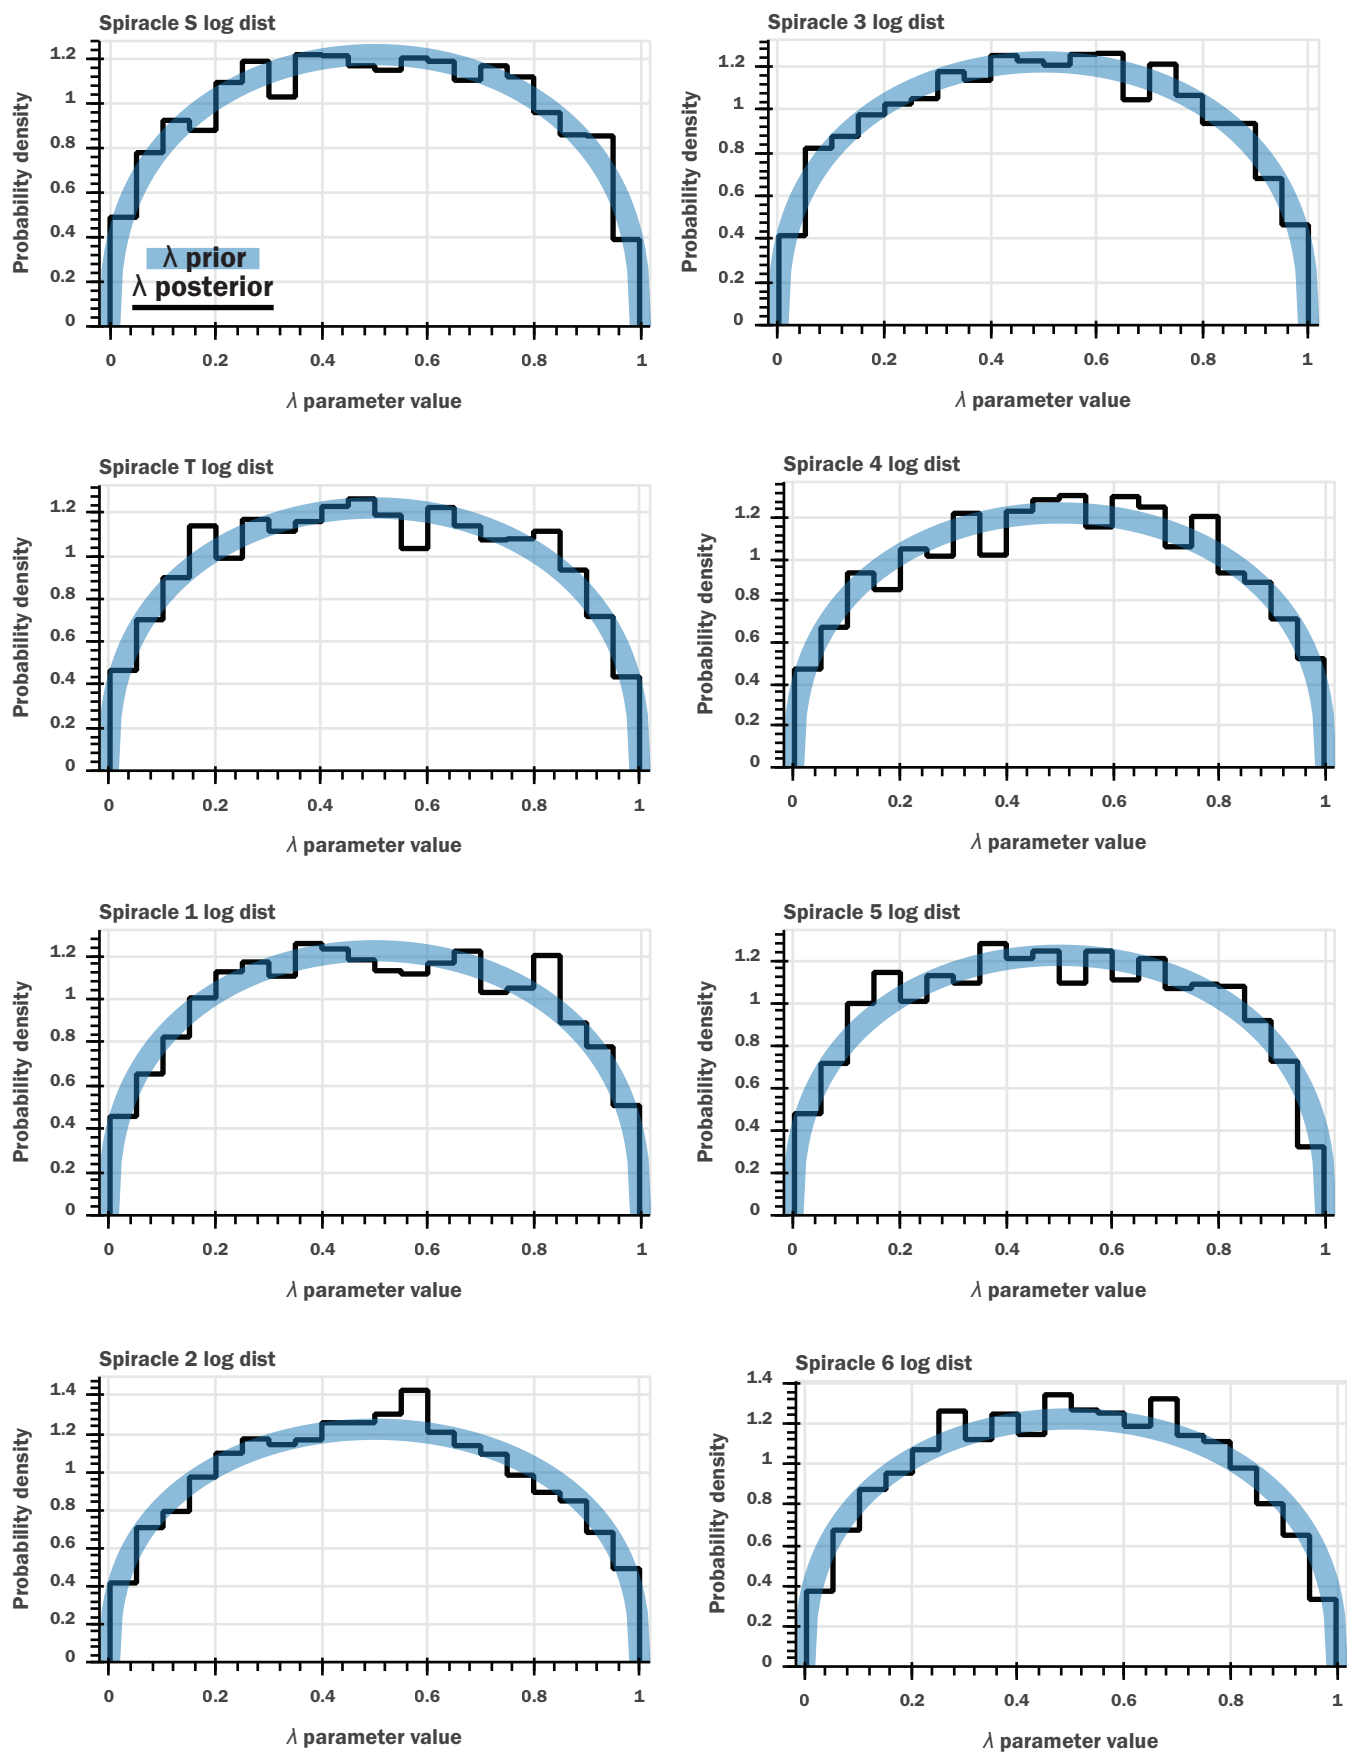

# Nonidentifiability of phylogenetic signal parameter, area/depth vs mass

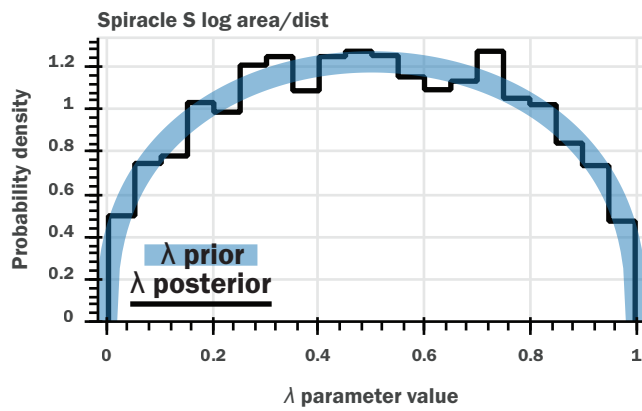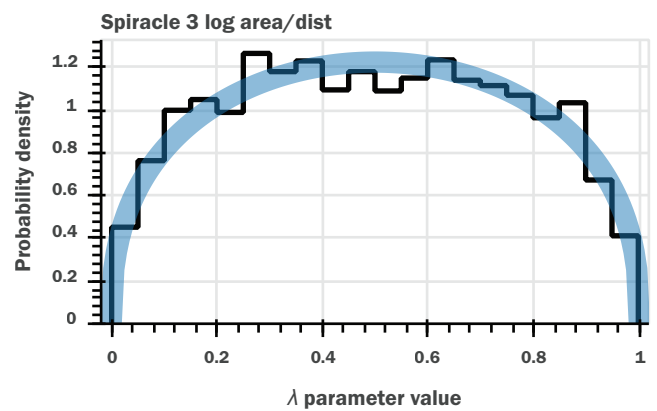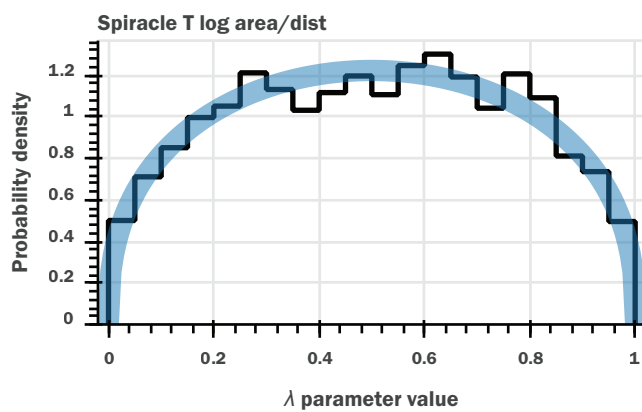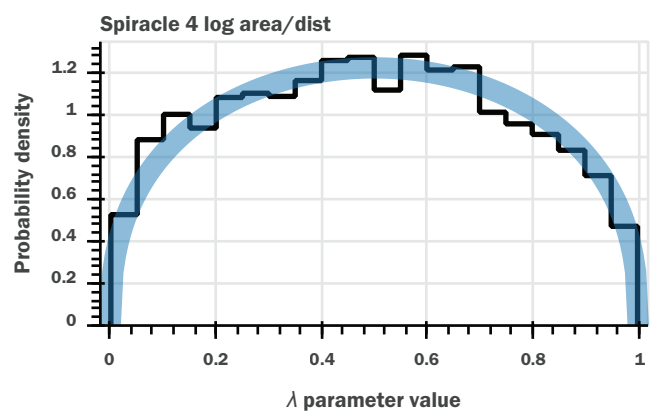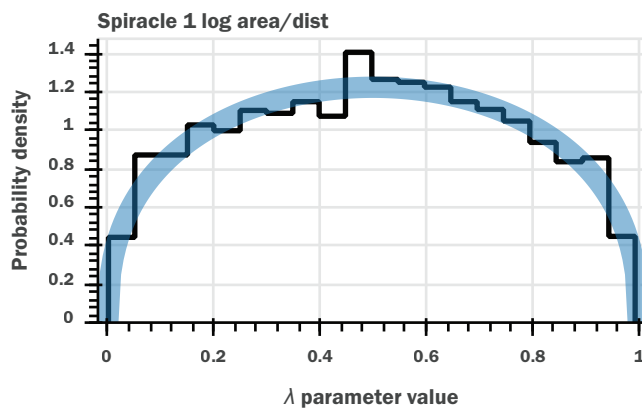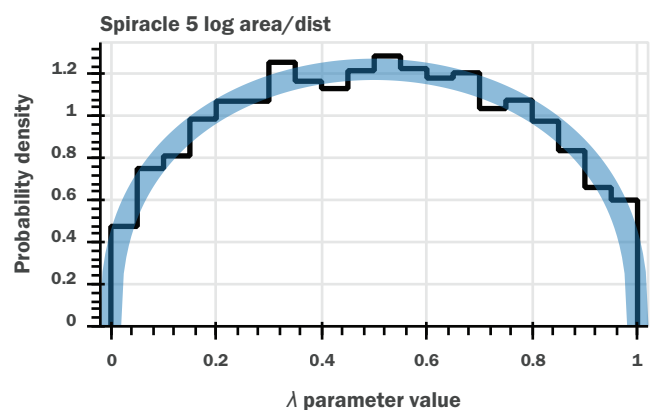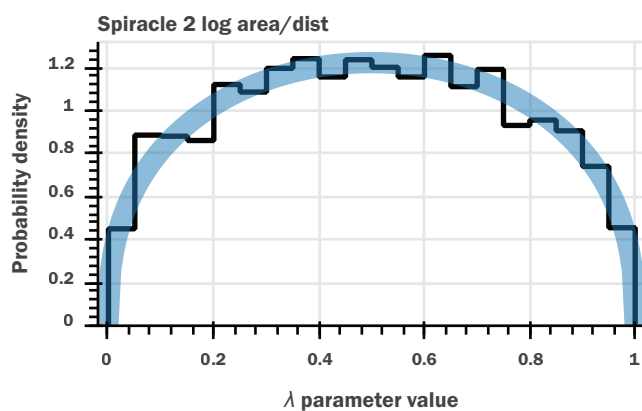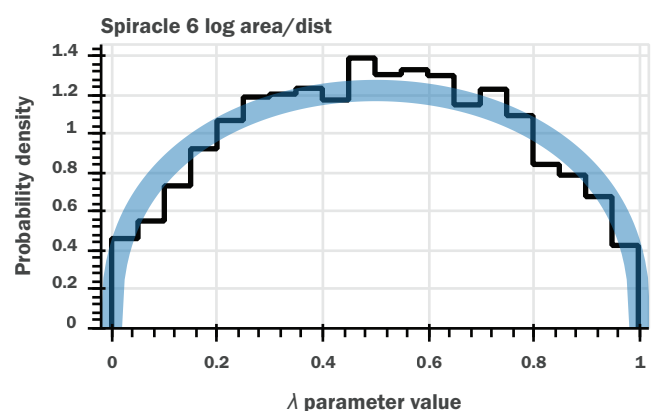

# Nonidentifiability of phylogenetic signal parameter, $\text{area}^2/\text{depth}$ vs mass

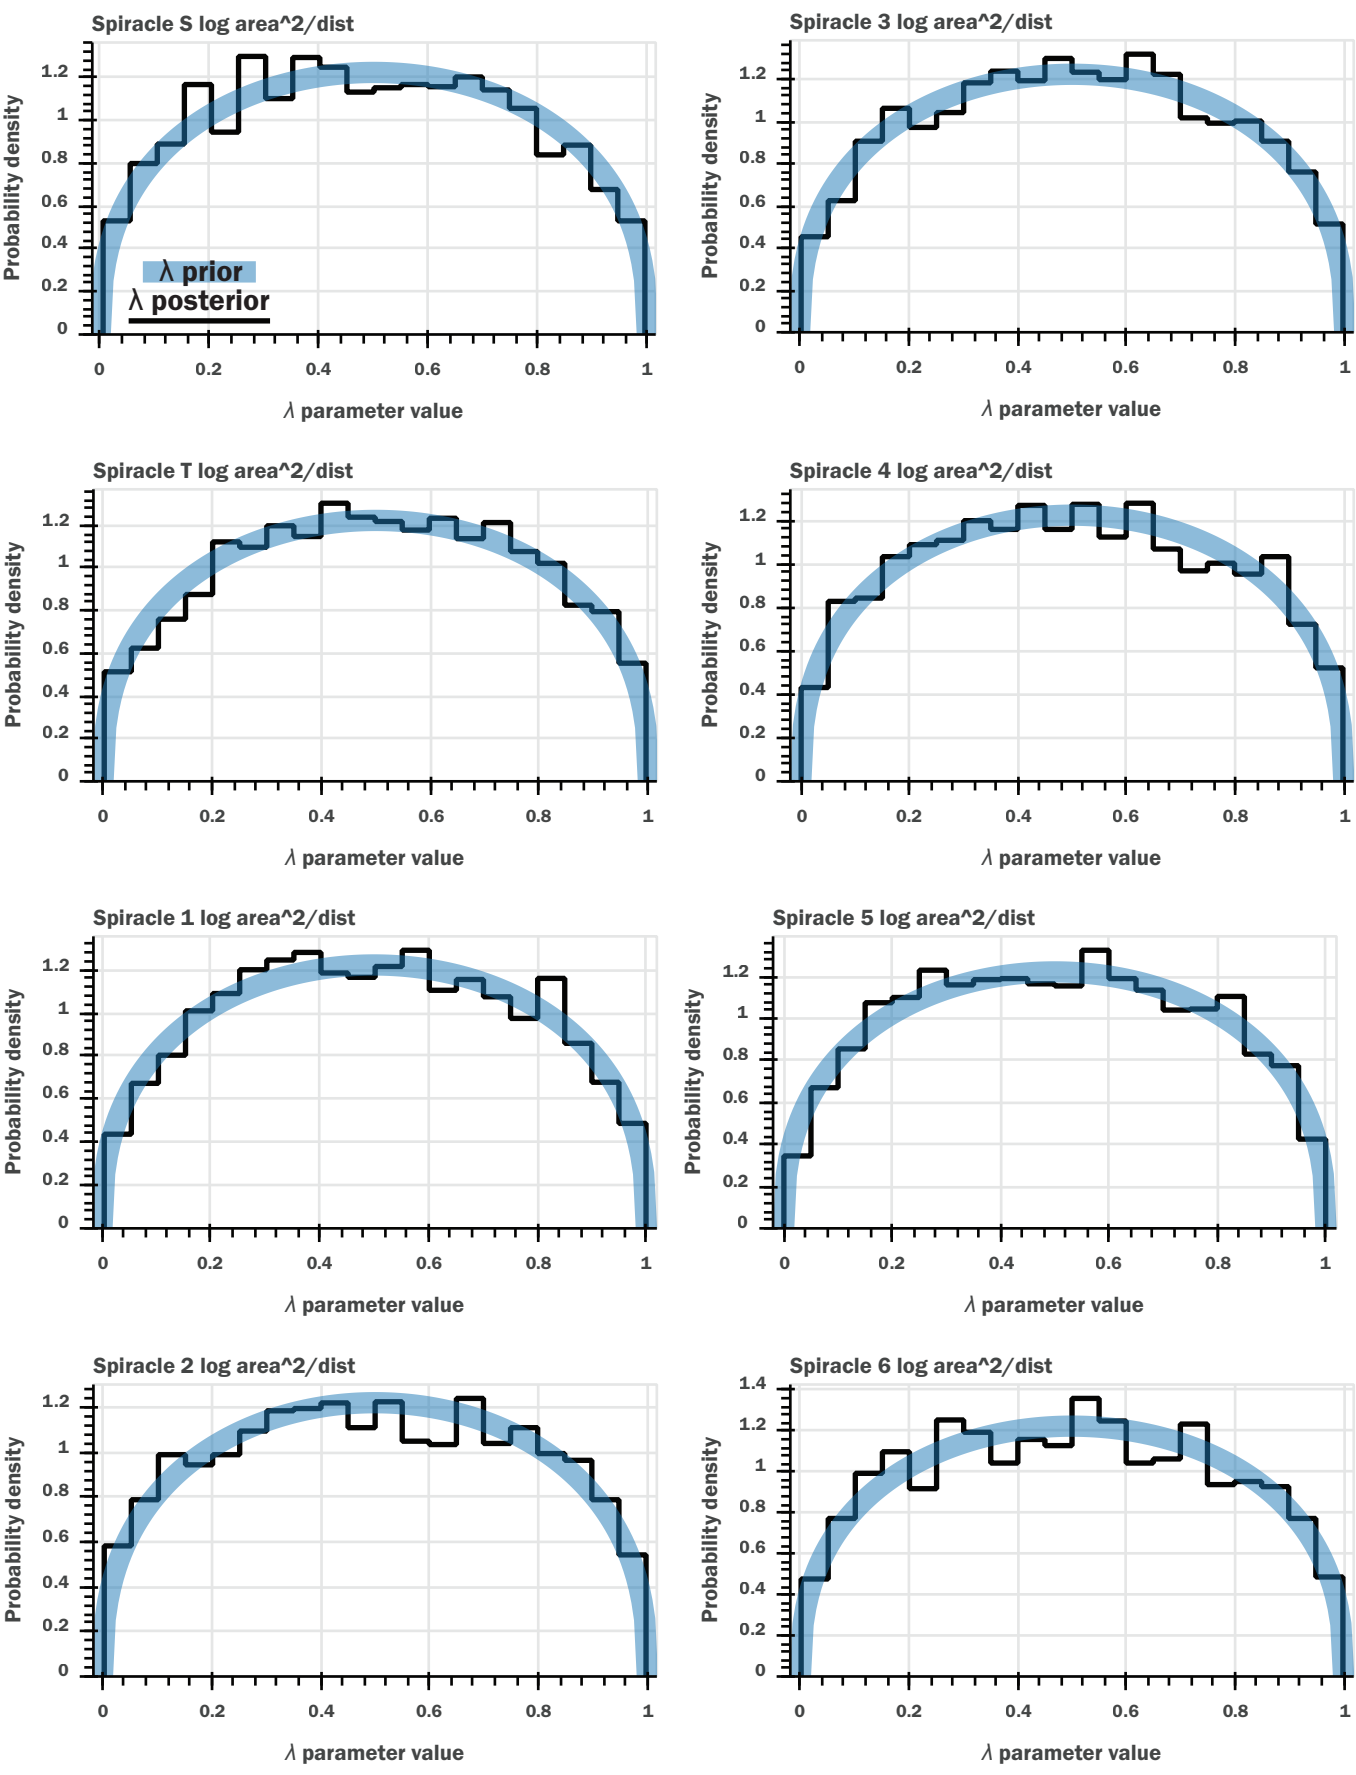

Supplement: supp [file elife_poa_e82129_Figure_2_figure_supplement_2.pdf › elife_poa_e82129_Figure_2_figure_supplement_2.pdf]
