# Supplementary material for: Isometric spiracular scaling in scarab beetles—implications for diffusive and advective oxygen transport
Source: eLife journal article supplement (doi:10.7554/elife.82129), 2022-09-13

Figure 2 - Figure supplement 4

## Bayesian regression, area vs mass

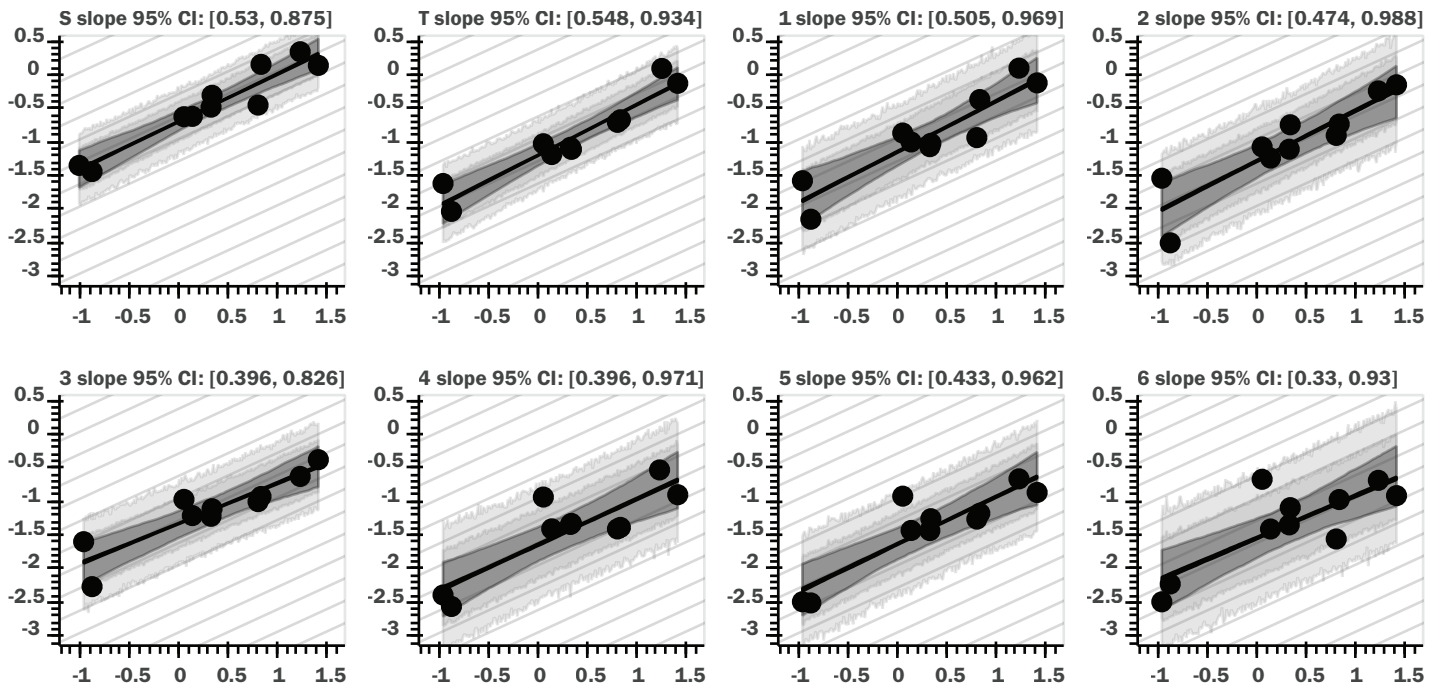

## OLS regression, bootstrap CI, area vs mass

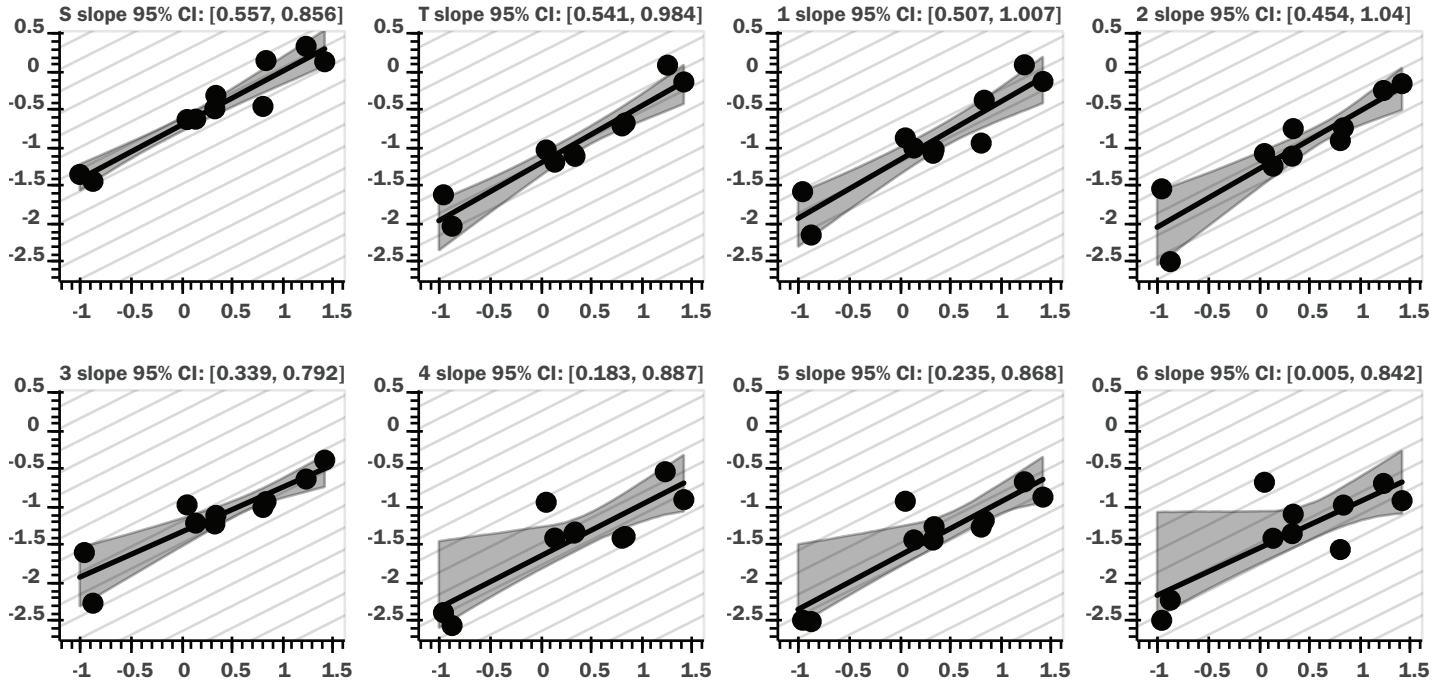

## Bayesian regression, depth vs mass

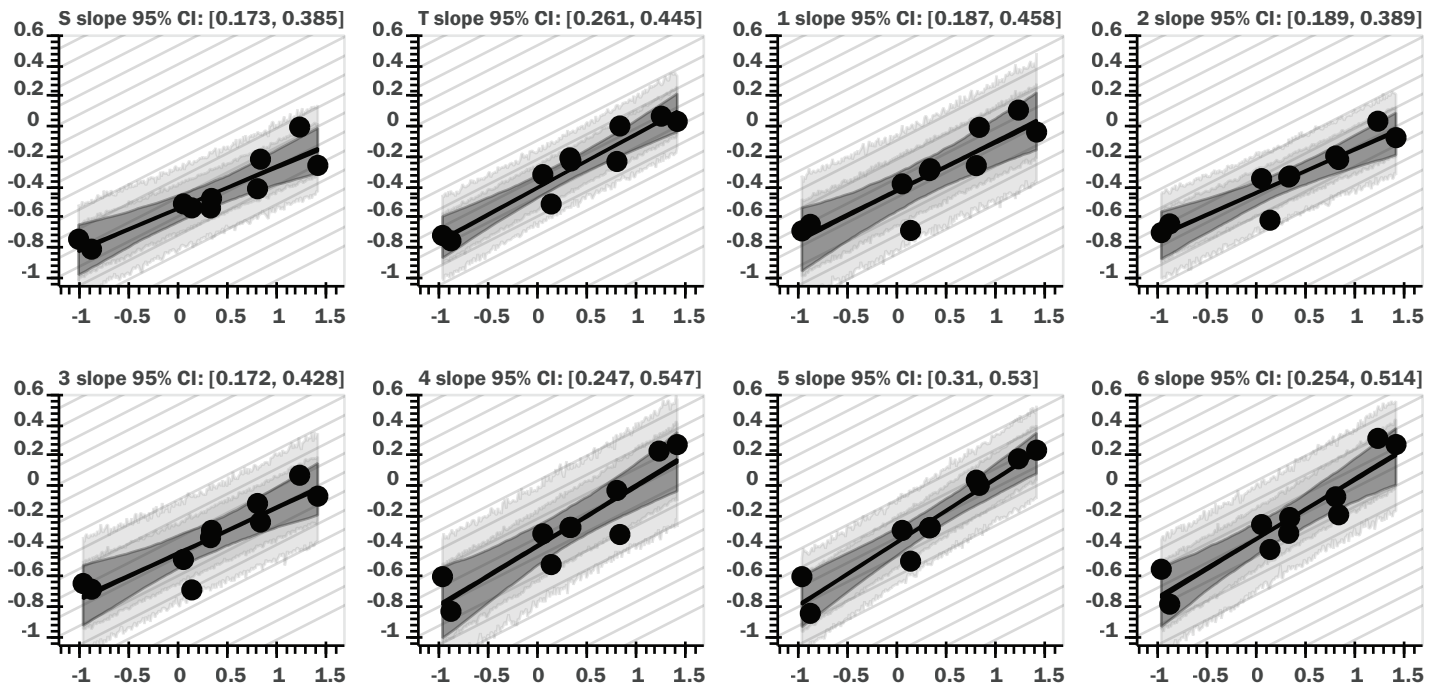

## OLS regression, bootstrap CI, depth vs mass

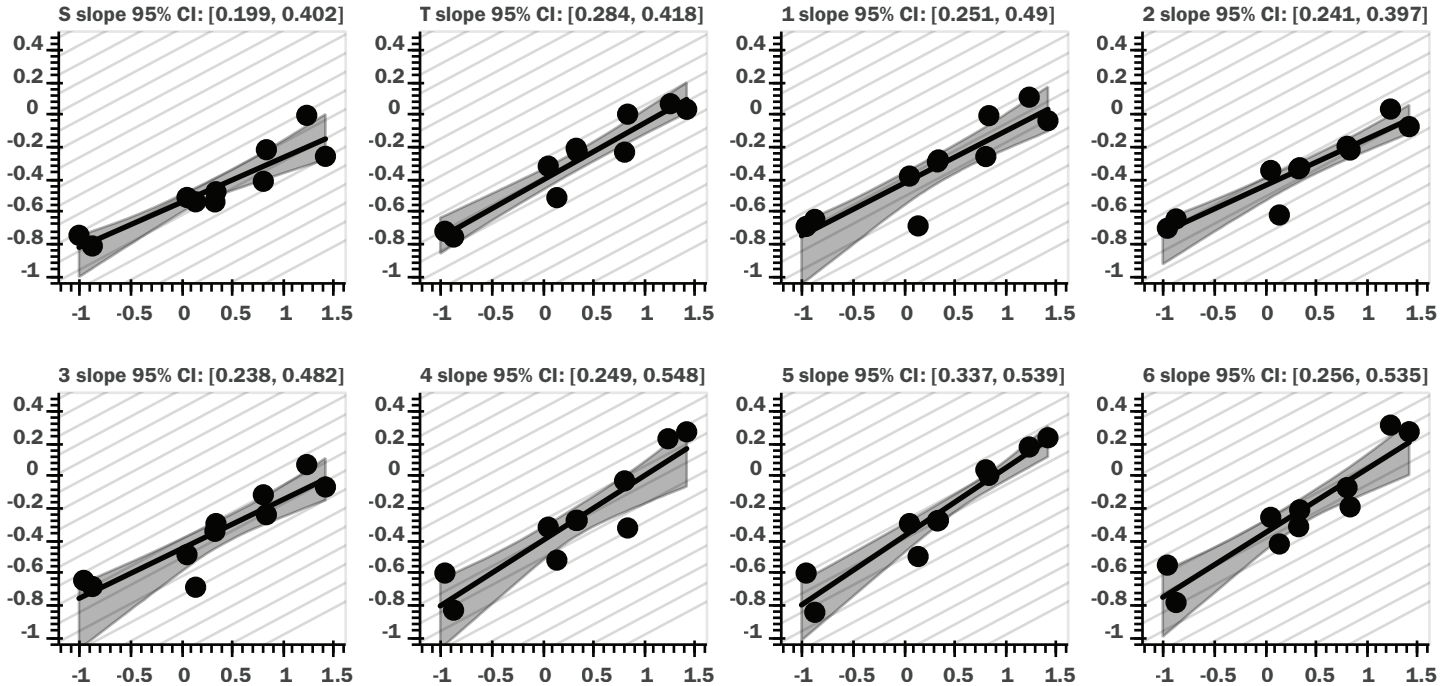

# Bayesian regression, area/depth vs mass

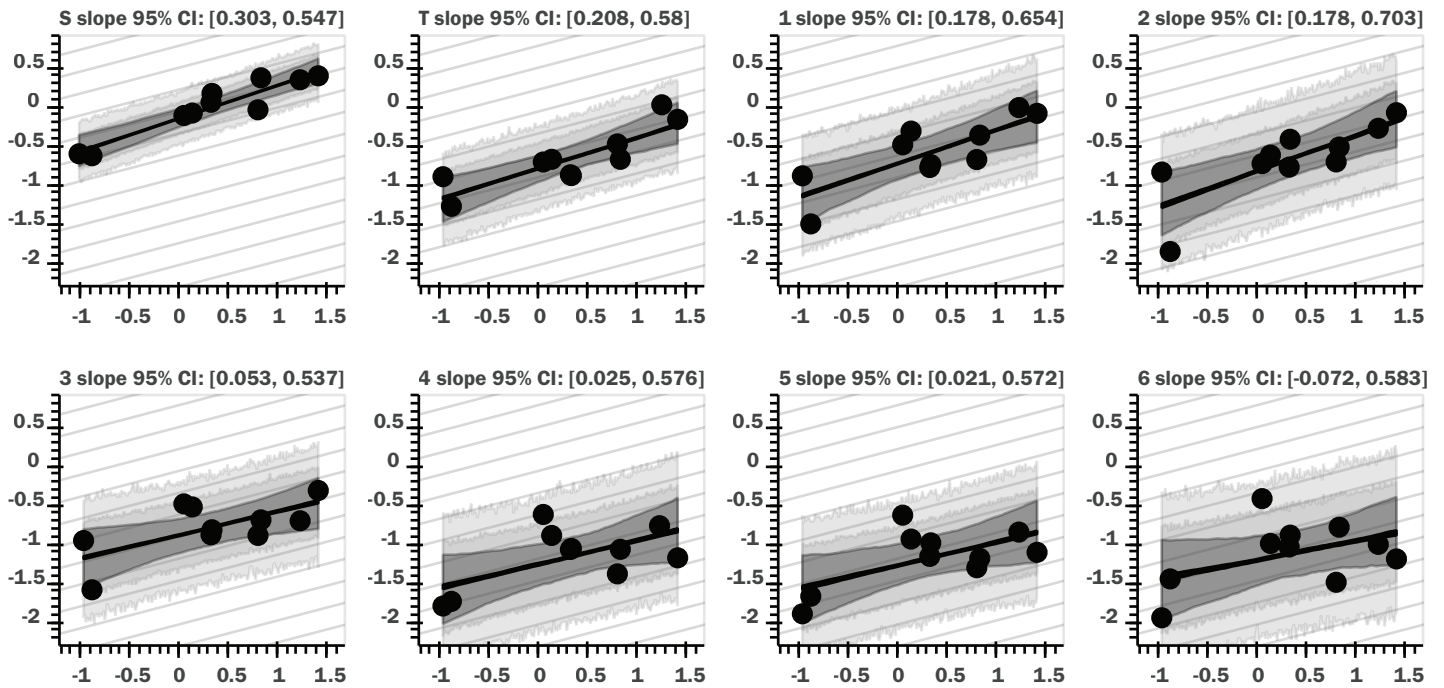

# OLS regression, bootstrap CI, area/depth vs mass

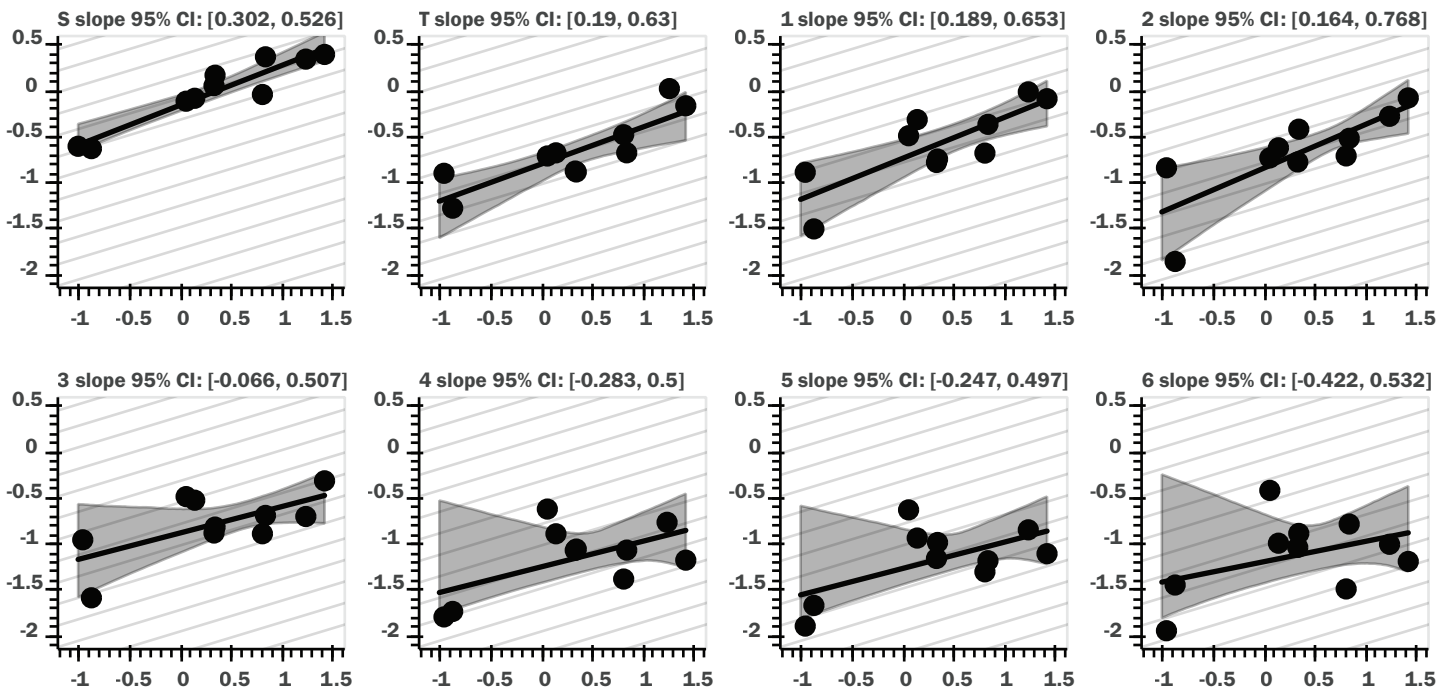

## Bayesian regression, area<sup>2</sup>/depth vs mass

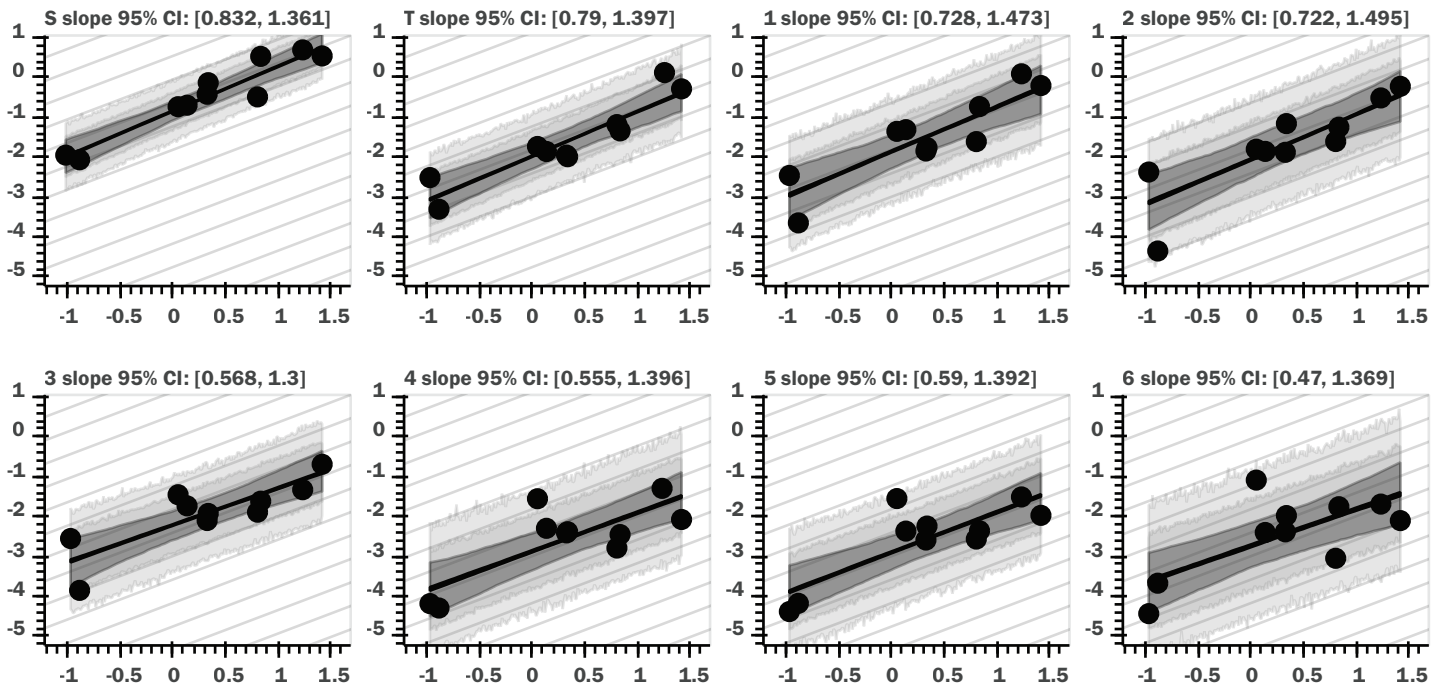

## OLS regression, bootstrap CI, area<sup>2</sup>/depth vs mass

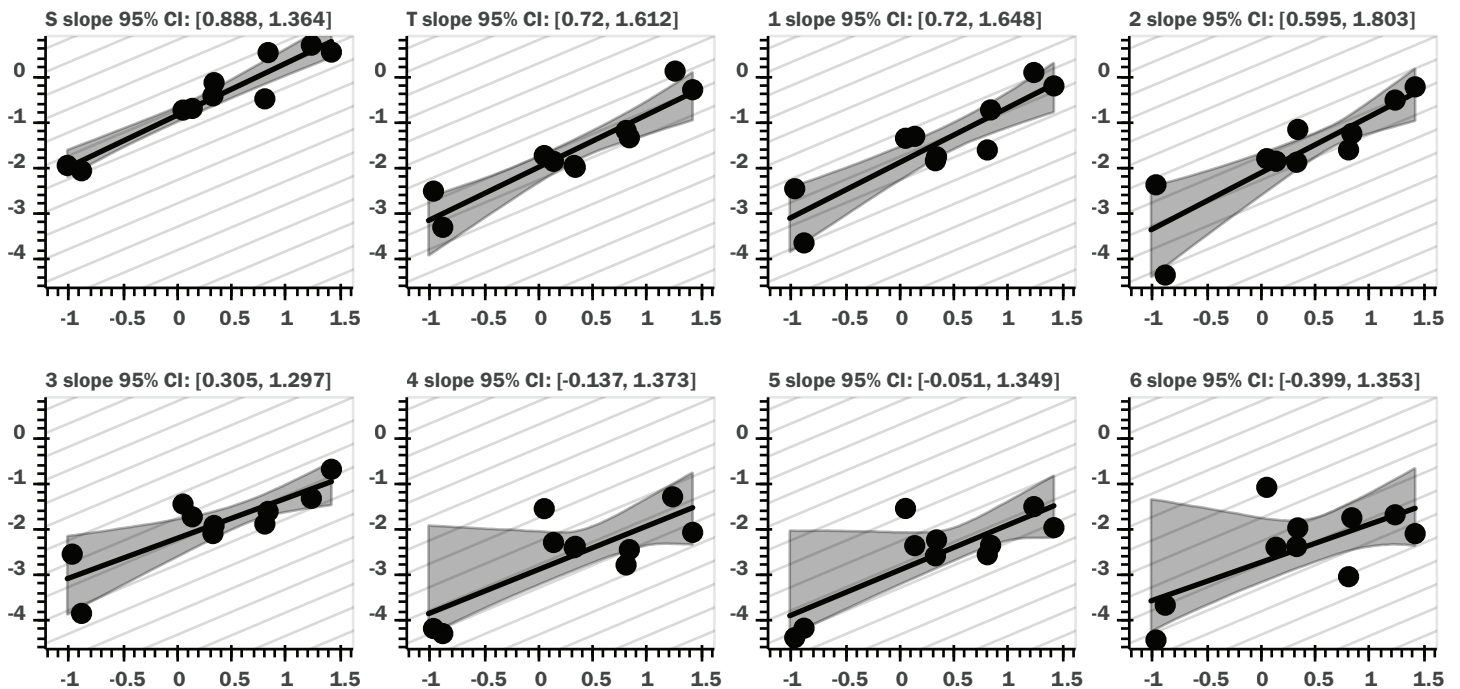

Supplement: supp [file elife_poa_e82129_Figure_2_figure_supplement_4.pdf › elife_poa_e82129_Figure_2_figure_supplement_4.pdf]
