# Supplementary figures and images for: Isometric spiracular scaling in scarab beetles—implications for diffusive and advective oxygen transport
Source: eLife journal article supplement (doi:10.7554/elife.82129), 2022-09-13

Figure 2 - figure supplement 3

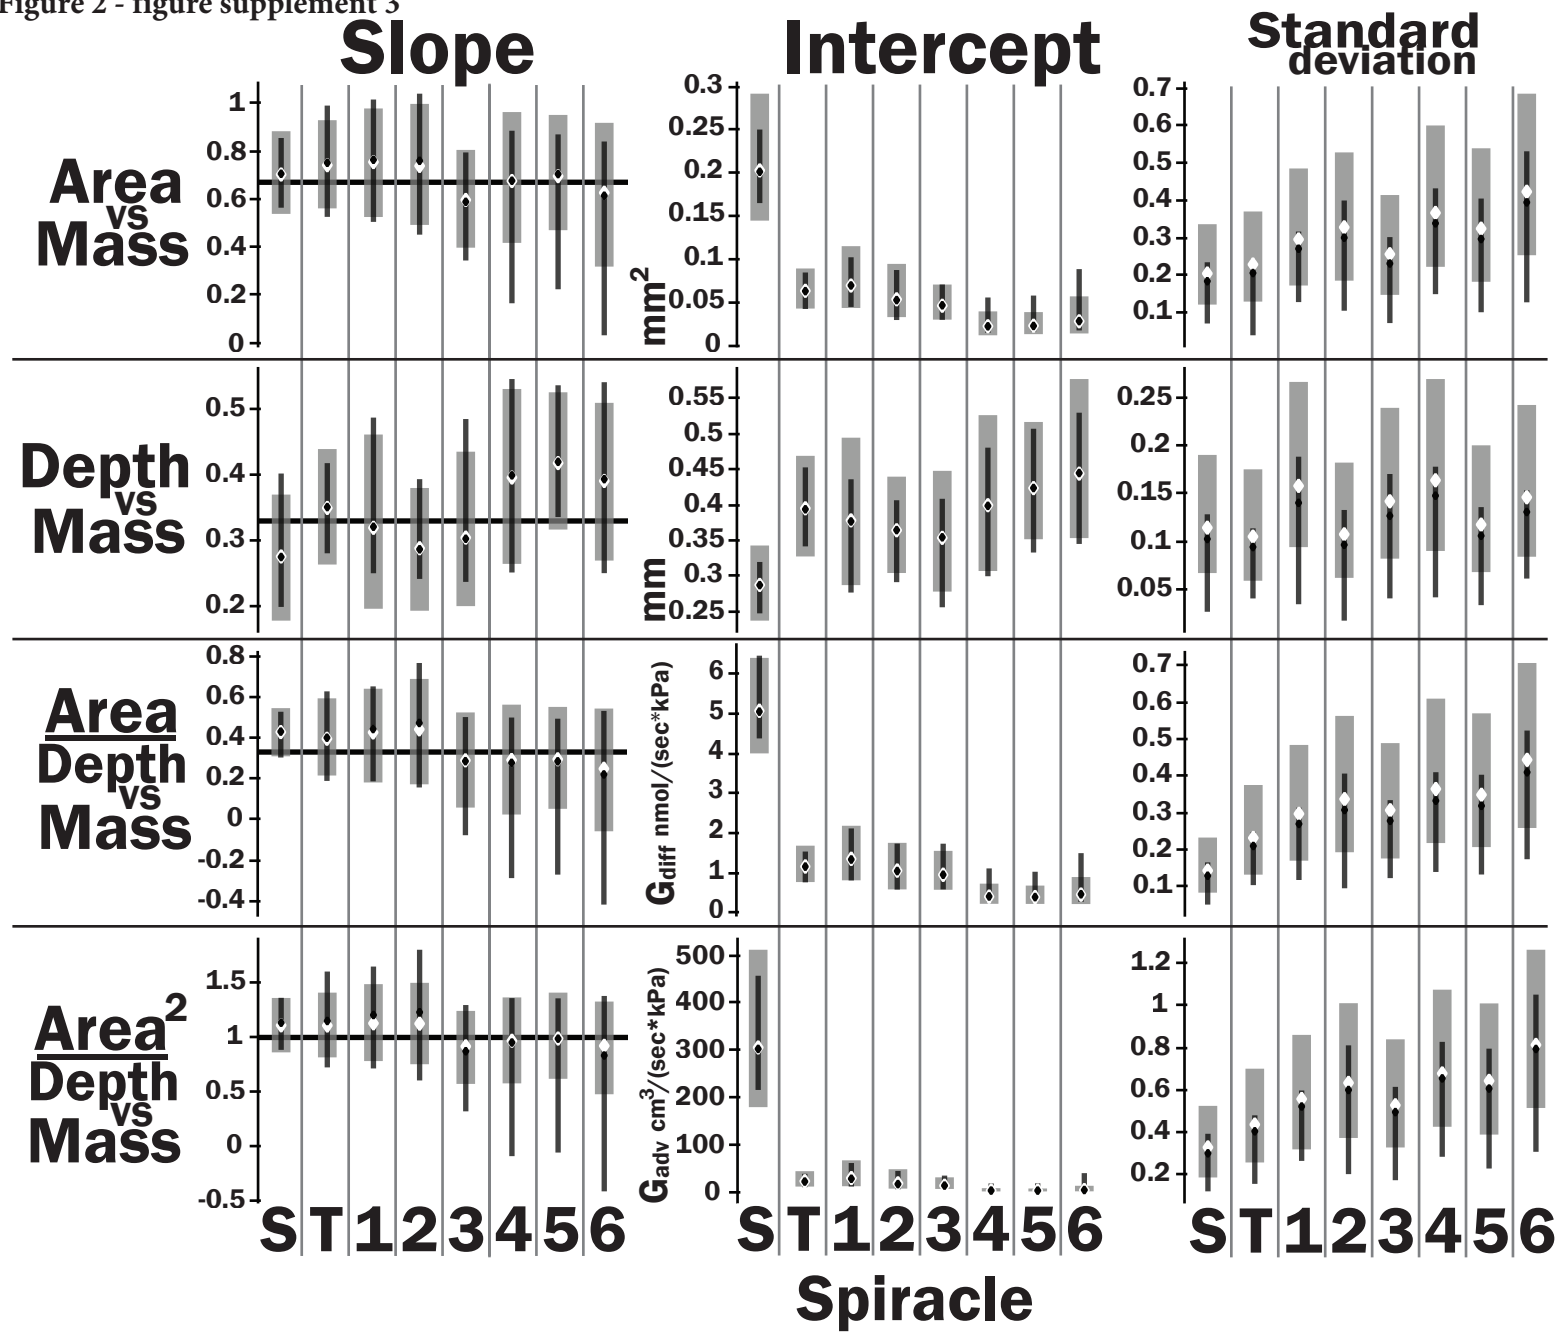

Supplement: supp [file elife_poa_e82129_Figure_2_figure_supplement_3.pdf › elife_poa_e82129_Figure_2_figure_supplement_3.pdf]
